RESEARCH ARTICLE

# Is there relationship between epicardial fat and cardiovascular parameters in incident kidney transplant patients? A post-hoc analysis

Daniel Constantino Yazbek<sup>1☉</sup>, Aluizio Barbosa Carvalho<sup>1‡</sup>, Cinara Sa Barros<sup>1</sup>, Jose Osmar Medina Pestana<sup>1</sup>, Carlos Eduardo Rochitte<sup>2‡</sup>, Raul Dias dos Santos Filho<sup>3‡</sup>, Maria Eugênia F. Canziani<sup>1☉\*</sup>

**1** Nephrology Division, Federal University of Sao Paulo, São Paulo, Brazil, **2** Cardiovascular Magnetic Resonance and Computed Tomography Sector, Heart Institute (InCor), University of São Paulo, Medical School, São Paulo, Brazil, **3** Lipid Clinic Heart Institute (InCor) University of Sao Paulo Medical School, São Paulo, Brazil

☉ These authors contributed equally to this work.

‡ These authors also contributed equally to this work.

\* [dialisefor@uol.com.br](mailto:dialisefor@uol.com.br)

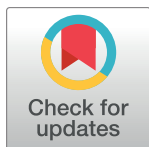

**OPEN ACCESS**

**Citation:** Yazbek DC, Carvalho AB, Barros CS, Medina Pestana JO, Rochitte CE, dos Santos Filho RD, et al. (2018) Is there relationship between epicardial fat and cardiovascular parameters in incident kidney transplant patients? A post-hoc analysis. PLoS ONE 13(2): e0191009. <https://doi.org/10.1371/journal.pone.0191009>

**Editor:** Abelardo I. Aguilera, Hospital Universitario de la Princesa, SPAIN

**Received:** August 1, 2017

**Accepted:** December 27, 2017

**Published:** February 21, 2018

**Copyright:** © 2018 Yazbek et al. This is an open access article distributed under the terms of the [Creative Commons Attribution License](https://creativecommons.org/licenses/by/4.0/), which permits unrestricted use, distribution, and reproduction in any medium, provided the original author and source are credited.

**Data Availability Statement:** All relevant data are within the paper and its Supporting Information files.

**Funding:** This study was supported by a grant from the FAPESP to Dr. Maria Eugênia F Canziani. The funders had no role in study design, data collection and analysis, decision to publish, or preparation of the manuscript.

**Competing interests:** The authors have declared that no competing interests exist.

## Abstract

### Background

Epicardial fat (EF) has been related to increased cardiovascular risk in chronic kidney disease patients. Kidney transplantation is associated with weight gain, especially within the first 12 months. Recently an association between EF and left ventricular mass (LVM) has been suggested in kidney transplant (KTX) recipients.

### Objective

Evaluate the EF in KTX recipients and its association with cardiovascular parameters in a 12-month follow-up study.

### Methods

EF volume was determined using thoracic computed tomography. The EF progressor group (EF gain) was defined by any increment in EF after 12 months. LVM and LVM index were calculated by echocardiography.

### Results

Ninety-eight incident KTX patients [57% men, 41.2 ± 10.1 years, mean dialysis time prior to transplant of 24 (11–60) months] were analyzed. At baseline and after 12 months, EF was 318.6 (275.2–392.6) ml and 329.5 (271.7–384.8) ml, respectively (p = 0.03). When compared to patients who EF decreased (n = 33), those with EF gain (n = 65) had a greater increase of body mass index, abdominal circumference and blood glucose. These patients also had a lower reduction of LVM index. However in the multivariate analysis, there was no

difference in LVM index change between groups (interaction  $p = 0.565$ ), even after adjustment for hypertension, glucose and coronary calcium score (interaction  $p = 0.538$ ).

## Conclusion

The impact of EF gain on ventricular mass after KTX could not be definitely confirmed. Further prospective studies in a large sample of KTX patients should be considered to address a possible causal relationship between EF gain and cardiac hypertrophy in this population.

## Introduction

Obesity is a public health problem that affects a large proportion of the global population and has shown an increasing prevalence in recent decades. It is estimated that  $> 50\%$  of the US population would be diagnosed with obesity by 2030 [1]. Recent data show that 1 in every 5 Brazilians is diagnosed with obesity, and the obesity rate has increased by approximately 60% in the last 10 years [2]. Obesity is also common in patients diagnosed with chronic kidney disease (CKD), and previous Brazilian reports have shown that 40% of adults with pre-dialysis CKD were overweight and 18% presented with obesity [3]. Among those awaiting a kidney transplant from deceased donor, 23% were diagnosed with obesity, and 2.1% of these patients presented with severe obesity [body mass index (BMI)  $> 40$ ] [4].

Weight gain is observed in approximately one-third of patients after kidney transplantation (KTX) [5]. This finding is primarily associated with increasing age and the use of corticosteroids [6,7]. Ducloux et al. have reported a mean elevation of  $2.7 \pm 5.8$  kg in patients a year after undergoing KTX [8]. The increase in body weight observed in this population is associated with the occurrence or worsening of metabolic syndrome, hypertension, post-transplant diabetes mellitus, graft loss, cardiovascular diseases, and increased mortality [8–12].

Epicardial fat (EF), a component of the visceral fat compartment, plays a key role in several important physiological functions such as regulation of homeostasis, providing a local energy source, angiogenesis, coronary remodeling, and buffering of the coronary arteries against torsion induced by myocardial contraction [13,14]. EF is known to serve as an endocrine organ with both, local and systemic functions, associated with the secretion of inflammatory hormones and cytokines [14]. An increase of EF has been shown to be associated with the deregulation of pro- and anti-inflammatory cytokines resulting in a state of chronic inflammation, which contributes to the onset and progression of metabolic and cardiovascular disorders [15]. Several studies demonstrate an association between EF and the occurrence of cardiovascular diseases in the general population [16–18]. Recently, cross-sectional studies have demonstrated an association between EF and increased left ventricular mass (LVM) in patients newly diagnosed with systemic arterial hypertension [18] and those diagnosed with CKD including a KTX group [19]. However, no studies have prospectively evaluated the role of EF in the KTX population and its association with cardiovascular disease.

## Objective

We aimed to evaluate the role of EF in KTX patients and its association with cardiovascular parameters by performing a 12-month follow-up study.

## Materials and methods

This is a post-hoc analysis of a randomized, controlled, and open-label study that evaluated the effects of statin use on coronary artery calcification in 100 incident KTX recipients [20].

### Study population

Recipients of KTX who were within 60 days post-transplant procedure were considered suitable to participate in the study. Exclusion criteria were: age < 18 or > 60 years, creatinine clearance < 30 mL/min, patients prioritized to undergo KTX, and those who had presented with any cardiovascular event or received statin 3 months prior to transplantation. Imaging studies could not be evaluated in 2 patients; thus, EF measurements were analyzed in 98 patients.

According to the local protocol, all of the patients underwent initial immunosuppression with prednisone. Seventy-nine patients (66%) were KTRs of living donors, whereas those with totally matched human leukocyte antigen (HLA) were 22%, partially matched 35% and fully mismatched 8%. KTRs of living donors with totally matched received cyclosporine and azathioprine and partially or fully mismatched used tacrolimus and azathioprine. Of note, preemptive transplantation was performed only in one patient. The KTRs of deceased donors were induced with basiliximab and received tacrolimus and mycophenolic acid. Thymoglobulin was used when patients had a higher panel reactive antibody (> 20%). No patients were using vitamin K antagonist during the study.

The study was reviewed and approved in 02/03/2007 by the Ethics Advisory Committee of the Federal University of São Paulo, and each patient signed the written informed consent form. Important to note, no deviation occurred in the duration of the study protocol. This study was registered at The Brazilian Clinical Trials Registry (REBEC—[www.ensaiosclinicos.gov.br/](http://www.ensaiosclinicos.gov.br/)) after the beginning the study, under the RBR-32RFMB number. The delay in registration was because at the time of the beginning of the study the REBEC platform was not available.

In addition, the authors confirm that all ongoing and related trials for this drug/intervention are registered.

### Laboratory data

Fasting blood samples were drawn to determine the following: serum creatinine, cystatin C, serum glucose, lipid profile, pH, bicarbonate, and C-reactive protein (CRP, immunometric assay, Immulite). Creatinine clearance was estimated using the Chronic Kidney Disease-Epidemiology Collaboration (CKD-EPI) creatinine/cystatin C equation [21].

### Assessment of images

Patients underwent thoracic computed tomography to obtain EF and coronary calcium score measurements. Previously obtained images were re-evaluated to measure EF using a Vitrea Core Enterprise Suite workstation-VES (Vital Images Inc., Plymouth, MN, USA). These were electrocardiogram-triggered axial images of the thorax covering the entire heart and acquired using standard parameters described elsewhere [22]. The regions of interest located around the heart on its epicardial surface showing a density between -30 and -200 Hounsfield units were defined as fat. EF located on the inner pericardial surface, which was in direct contact with the epicardial surface of the heart, was demarcated by drawing a line along the pericardial path. After defining the regions of interest, a volumetric tool was used to measure the mean density of the pixels in each region of interest, as well as the volume of each compartment

(expressed as mL). The evolution of EF over time was calculated based on the volumetric variation in pericardial fat at baseline and after 12 months ( $\Delta = 12 \text{ months} - \text{baseline epicardial fat}$ ). The progressor fat group showed a  $\Delta \text{ EF} > 0$ .

The coronary calcium score was determined by multiplying the area of each calcified lesion by a weighting factor corresponding to the peak pixel intensity for each lesion. The sum of each lesion of all coronary arteries was considered for the analysis as previously described [22]. The calcium score was expressed as Agatston Units (AU), and the presence of coronary calcification was defined as a calcium score  $> 10 \text{ AU}$ .

Two-dimensional color Doppler echocardiography (Philips HDI 5000, Royal Philips Electronics, Netherlands) was performed based on the recommendations of the American Society of Echocardiography [23]. The left atrial diameter (LAD), diameter of the interventricular septum (SIV), left ventricular posterior wall thickness (LVEP) and left ventricular diastolic diameter (LVD) were measured in millimeters. Using the Teichholz method, we analyzed left ventricular systolic function based on the ejection fraction. The left ventricular mass (LVM) and left ventricular mass index (LVMI) were calculated based on the formulas:  $\text{LVM (g)} = 0.8 \times (1.04 \times [\text{LVD} + \text{SIV} + \text{LVEP}]^3 - [\text{LVD}]^3) + 0.6$  and  $\text{LVMI} = \text{LV mass/body surface area}$ . A value of  $\text{LVMI} > 115 \text{ g/m}^2$  for men and  $> 95 \text{ g/m}^2$  for women was interpreted as the presence of left ventricular hypertrophy.

## Statistical analysis

The mean and standard deviation, median and interquartile range, or frequency (proportion) were calculated for the variables. The Kolmogorov-Smirnov statistical test was used to investigate the normal distribution of data. Comparisons of continuous variables between groups were performed using the Student's t-test and the Mann-Whitney U-test, and within groups using the Student's t-test or Wilcoxon signed rank test for normal and skewed data, respectively. Comparisons of proportions were performed using chi-squared analysis or the Fischer exact test or the McNemar test. The generalized estimating equation (GEE) was used to identify the association between the changes of EF and LMVI. The final model was adjusted for hypertension, glucose and coronary calcium score. P values  $< 0.05$  were considered statistically significant. All statistical analyses were performed using SPSS for Windows version 15.0 software (SPSS Inc, Chicago, IL).

## Results

Baseline characteristics of the study population are shown in Table 1. Patients were between 20 and 60 years of age, predominantly men, with a high prevalence of hypertension and a sedentary lifestyle. The mean prior dialysis time was 2 years and 66% of the patients had received live donor kidneys. We observed that 30% of the patients were overweight, 8% had been diagnosed with obesity, and 40% showed an increased abdominal circumference. We observed that 62% of the patients were stage 3 CKD, 19% showed fasting serum glucose  $> 100 \text{ mg/dL}$ , 55% showed elevated low-density lipoprotein (LDL)-cholesterol and 52% showed hypertriglyceridemia. Regarding cardiovascular parameters, 20% of the patients showed an increased LAD, 5% showed decreased left ventricular ejection fraction, 64% showed left ventricular hypertrophy, and 33% showed coronary calcification.

The EF volume was 318.6 mL (275.2–392.6) and 329.5 mL (271.7–384.8), at baseline and after 12 months, respectively ( $P = 0.03$ ). The median change in EF was 9.12 mL (-14.5 to 28.2). In 33 patients the EF volume was observed to decrease, while in 65 patients the EF value was observed to increase during the course of 12 months (fat regressor and fat progressor groups, respectively, Fig 1).

**Table 1. Characteristics of the study population at baseline (n = 98).**

|                                              |                          |
|----------------------------------------------|--------------------------|
| age (years)                                  | 41.2 ± 10.1              |
| Male n (%)                                   | 56 (57)                  |
| Smoking n (%)                                | 8 (8)                    |
| Hypertension n (%)                           | 87 (89)                  |
| Diabetes n (%)                               | 7 (7)                    |
| Sedentary n (%)                              | 77 (78)                  |
| Prior dialysis time (months)                 | 24(11–60)                |
| Deceased donors n(%)                         | 33 (34)                  |
| Use of statins n (%)                         | 50 (51)                  |
| BMI (kg/m <sup>2</sup> )                     | 23.9 ± 4.1               |
| WC (cm)                                      | 87.7 ± 10.9              |
| SBP (mmHg)                                   | 131.5 ± 14.7             |
| DBP (mmHg)                                   | 83.4 ± 10.0              |
| CKD EPI Cr/Cys (ml/min/1.73 m <sup>2</sup> ) | 47.5 ± 12.9              |
| Glucose (mg/dl)                              | 88 (80–97)               |
| Total cholesterol (mg/dl)                    | 201.9 ± 42.4             |
| HDL-c (mg/dl)                                | 55.4 ± 15.8              |
| LDL-c (mg/dl)                                | 110.8 ± 32.4             |
| Triglycerides (mg/dl)                        | 153 (109–153)            |
| C-reactive protein (mg/l)                    | 0.09 (0.04–0.33)         |
| Left atrium (mm)                             | 38.2 ± 5.1               |
| Fraction ejection                            | 0.68 (0.64–0.71)         |
| LVM index (g/m <sup>2</sup> )                | 123 (98–159)             |
| Coronary calcium score (AU)                  | 0 (0–24)<br>132.9 ± 50.9 |

Mean ± standard deviation, median (interquartiles)

BMI—body mass index; WC—waist circumference; SBP—systolic blood pressure; DBP—diastolic blood pressure; HDL-c—HDL cholesterol; LDL-c—LDL cholesterol; LVM—left ventricular mass

<https://doi.org/10.1371/journal.pone.0191009.t001>

Table 2 shows demographic and laboratory characteristics of patients at baseline and at 12 months based on EF groups. During the study, patients from the fat regressor group showed an increase in BMI, bicarbonate, CRP, and a decrease in total cholesterol, high-density lipoprotein (HDL), LDL, and triglycerides. Patients from the fat progressor group showed an increase in BMI, waist circumference, serum glucose, pH, bicarbonate and a decrease in total, HDL and LDL-cholesterol.

Comparing between the groups we observed that the fat progressor group showed higher bicarbonate levels at baseline and higher LDL-cholesterol levels at 12 months. This group also showed a greater increase in BMI, waist circumference and glucose levels during the study. No statistically significant difference was observed between the fat progressor and regressor groups in terms of the use of antihypertensive drugs, such as beta (β) blockers (46 vs. 48%, p = 0.83), calcium channel blockers (40 vs. 39%, p = 0.95), angiotensin converting enzyme inhibitors/angiotensin II receptor blockers (ACEI/ARB) (29 vs. 30%, p = 0.91). Of note, there were no difference in occurrence of acute rejection between the groups (8% in progressor vs. 9% regressor groups, p = 1.0).

Table 3 shows the comparison of cardiovascular parameters between the groups. LVMI was observed to decrease in both groups during the study. A significantly smaller decrease in the LVMI was observed in the fat progressor group than in the fat regressor group (p = 0.048; Fig

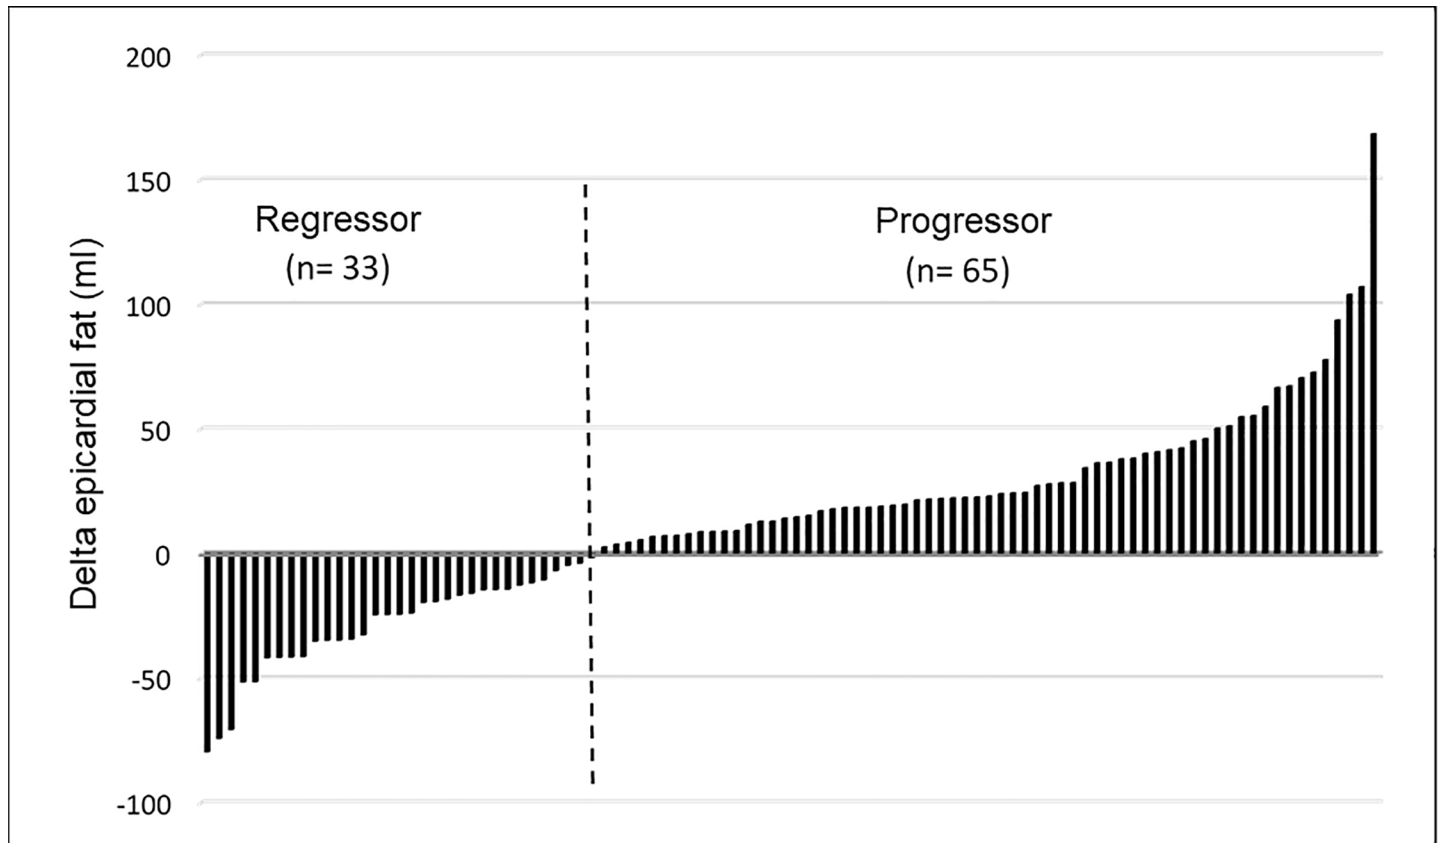

**Fig 1. Behavior of epicardial fat (EF) during the study.**

<https://doi.org/10.1371/journal.pone.0191009.g001>

2A). Additionally, a decrease of  $\geq 30\%$  in the LVMI was observed in 16% and 44% of the patients in the fat progression and regression groups, respectively ( $p = 0.043$ ). There were no statistically significant differences observed between the groups in terms of changes in the left atrium diameter, ejection fraction, and coronary calcium score.

The multivariate model GEE (Fig 2B) shows that there was no statistically significant difference in the LVMI between groups (group effect  $p = 0.002$ , time effect  $p < 0.001$ , interaction  $p = 0.565$ ) even after adjustment for hypertension, serum glucose, and coronary calcium score (group effect  $p = 0.024$ , time effect  $p < 0.001$ , interaction  $p = 0.538$ ).

## Discussion

In this prospective study an increase in EF volume was observed in 65%, while a decrease of LVM was observed in 79% of the incident KTX recipients, after a 12-month follow-up. No relationship between the change of EF and LVM could be definitively confirmed.

Obesity, represented by elevation of waist circumference and BMI, is a common finding in early post-transplant recipients and has been associated with an increased risk of cardiovascular disease and graft failure [24]. A recent study demonstrated a progressive elevation in BMI during a 12-month follow up after KTX [25]. Hoogveen et al. have reported an increase in the prevalence of obesity (5.6% to 11.4%) a year after KXT [9]. In the present study a significant increase in BMI and 50% increase in the prevalence of obesity was observed after 12 months (8–20%, data not shown). This weight gain could be related to an increased appetite secondary to steroid therapy, improvement of the uremic milieu, and an initial period of physical

Table 2. Comparison of demographic and laboratory parameters in the epicardial fat progressor and regressor groups.

|                                              | Progressor (n = 65) |                  |                   | P       | Regressor (n = 33) |                  |                   | P       | P between groups |          |        |
|----------------------------------------------|---------------------|------------------|-------------------|---------|--------------------|------------------|-------------------|---------|------------------|----------|--------|
|                                              | Baseline            | 12 month         | Delta             |         | Baseline           | 12 month         | Delta             |         | Baseline         | 12 month | Delta  |
| Age (years)                                  | 41.3 ± 10.6         |                  |                   |         | 41.4 ± 9.2         |                  |                   |         | 0.90             |          |        |
| Male n (%)                                   | 35 (54)             |                  |                   |         | 21 (64)            |                  |                   |         | 0.35             |          |        |
| Smoking n (%)                                | 4 (6)               |                  |                   |         | 4 (12)             |                  |                   |         | 0.44             |          |        |
| Hypertension n (%)                           | 59 (91)             |                  |                   |         | 28 (85)            |                  |                   |         | 0.50             |          |        |
| Diabetes n (%)                               | 6 (9)               |                  |                   |         | 1 (3)              |                  |                   |         | 0.42             |          |        |
| Sedentary n (%)                              | 51 (78)             |                  |                   |         | 26 (79)            |                  |                   |         | 0.97             |          |        |
| Prior dialysis time (months)                 | 24 (11–59)          |                  |                   |         | 24 (12–61)         |                  |                   |         | 0.66             |          |        |
| KTXRs with deceased donors n (%)             | 46 (71)             |                  |                   |         | 19 (58)            |                  |                   |         | 0.19             |          |        |
| Use of statins n (%)                         | 34 (52)             |                  |                   |         | 16 (48)            |                  |                   |         | 0.72             |          |        |
| BMI (kg/m <sup>2</sup> )                     | 24.0 ± 4.3          | 26.7 ± 4.9       | 2.67 ± 2.62       | < 0.001 | 23.7 ± 3.7         | 25.1 ± 4.6       | 1.33 ± 1.92       | < 0.001 | 0.71             | 0.11     | 0.005  |
| WC (cm)                                      | 87.2 ± 11.7         | 94.1 ± 12.7      | 7.69 ± 9.63       | <0.001  | 88.8 ± 9.2         | 90.6 ± 10.3      | 1.74 ± 5.55       | 0.08    | 0.45             | 0.15     | <0.001 |
| SBP (mmHg)                                   | 131.7 ± 15.3        | 130.0 ± 14.2     | -1.7 ± 18.6       | 0.47    | 131.2 ± 13.9       | 130.6 ± 13.2     | -0.6 ± 18.2       | 0.85    | 0.88             | 0.83     | 0.78   |
| DBP (mmHg)                                   | 82.9 ± 10.1         | 82.8 ± 8.9       | -0.15 ± 12.4      | 0.92    | 84.2 ± 10.0        | 83.0 ± 8.1       | -1.2 ± 12.7       | 0.59    | 0.54             | 0.88     | 0.69   |
| CKD EPI Cr/Cys (ml/min/1.73 m <sup>2</sup> ) | 47.7 ± 12.6         | 50.5 ± 12.5      | 2.8 ± 10.8        | 0.08    | 47.1 ± 13.7        | 51.6 ± 15.4      | 3.6 ± 11.1        | 0.13    | 0.85             | 0.75     | 0.77   |
| Glucose (mg/dl)                              | 87 (79–94)          | 92 (82–99)       | 6.0 (-3.0–12.5)   | 0.03    | 91 (80–99)         | 89 (84–97)       | 1.0 (-8.5–6.5)    | 0.45    | 0.20             | 0.77     | 0.03   |
| Total cholesterol (mg/dl)                    | 201.8 ± 41.4        | 170.2 ± 38.3     | -32.6 ± 46.1      | <0.001  | 202.1 ± 44.9       | 160.4 ± 36.6     | -41.6 ± 42.1      | <0.001  | 0.98             | 0.22     | 0.30   |
| HDL-c (mg/dl)                                | 56.3 ± 14.9         | 46.1 ± 13.3      | -10.2 ± 14.4      | <0.001  | 53.7 ± 17.7        | 46.0 ± 15.6      | -7.7 ± 12.8       | 0.002   | 0.46             | 0.96     | 0.40   |
| LDL-c (mg/dl)                                | 112.9 ± 33.0        | 98.0 ± 32.8      | -16.7 ± 32.9      | <0.001  | 106.4 ± 31.1       | 83.6 ± 31.2      | -22.3 ± 26.2      | <0.001  | 0.35             | 0.04     | 0.41   |
| Triglycerides (mg/dl)                        | 141 (105–196)       | 134 (81–189)     | -12 (-62–29)      | 0.20    | 171 (117–231)      | 139 (111–186)    | -32 (-99–35)      | 0.05    | 0.10             | 0.28     | 0.24   |
| pH                                           | 7.30 ± 0.06         | 7.32 ± 0.05      | 0.03 ± 0.05       | <0.001  | 7.30 ± 0.05        | 7.33 ± 0.04      | 0.02 ± 0.06       | 0.10    | 0.79             | 0.51     | 0.55   |
| Bicarbonate (mmol/l)                         | 26 (22–28)          | 27 (25–29)       | 1 (-1–4)          | 0.003   | 24 (20–26)         | 26 (24–28)       | 2 (-1–5)          | 0.02    | 0.04             | 0.08     | 0.74   |
| C-reactive protein (mg/l)                    | 0.10 (0.04–0.34)    | 0.18 (0.09–0.35) | 0.03 (-0.19–0.14) | 0.71    | 0.09 (0.04–0.23)   | 0.27 (0.08–0.76) | 0.10 (-0.03–0.40) | 0.008   | 0.83             | 0.30     | 0.07   |

Mean ± standard deviation, median (interquartiles)

KTXR—kidney transplant recipients; BMI—body mass index; WC—waist circumference; SBP—systolic blood pressure; DBP—diastolic blood pressure; HDL-c—HDL cholesterol; LDL-c—LDL cholesterol.

<https://doi.org/10.1371/journal.pone.0191009.t002>

inactivity following transplant surgery. Post-transplant weight gain has also been associated with the presence of hyperglycemia and diabetes (28). Data obtained from the Organ Procurement and Transplantation Network and Scientific Registry of Transplant Recipients (OPTN/SRTR) have shown that the incidence of diabetes is higher in those diagnosed with obesity/overweight patients—in fact, within a year, the prevalence of post-transplant diabetes in those with obesity/overweight patients was 10% compared to only 3% in those with a normal BMI [26]. Moreover, the risk of new-onset diabetes mellitus increases linearly with a rise of every 1 kg above 45 kg [27]. Recent studies have suggested that impairment in glucose metabolism secondary to insulin resistance and inflammation could lead to an increase in visceral fat in this population [28,29]. However, in the present study, we observed only a change toward to higher glucose levels but not to inflammation in the progressor group. Unfortunately, the insulin resistance index was not evaluated in this study.

Table 3. Comparison of cardiovascular parameters in the epicardial fat regressor and progressor groups.

|                               | Progressor (n = 65) |                     |                    | P      | Regressor (n = 33)  |                     |                     | P      | P between groups |          |        |
|-------------------------------|---------------------|---------------------|--------------------|--------|---------------------|---------------------|---------------------|--------|------------------|----------|--------|
|                               | Baseline            | 12 month            | Delta              |        | Baseline            | 12 month            | Delta               |        | Baseline         | 12 month | Delta  |
| Epicardial Fat (ml)           | 309.7 (257.3–354.5) | 341.0 (282.5–386.8) | 23.2 (14.5–43.9)   | <0.001 | 337.2 (295.6–415.6) | 314.2 (266.3–390.2) | -24.4 (-41.4–-14.4) | <0.001 | 0.02             | 0.42     | <0.001 |
| Left atrium (mm)              | 37.8 ± 5.4          | 36.6 ± 4.5          | -0.8 ± 4.4         | 0.30   | 38.9 ± 4.8          | 38.2 ± 5.2          | -0.8 ± 5.2          | 0.57   | 0.36             | 0.24     | 0.99   |
| Ejection fraction             | 0.69 (0.66–0.72)    | 0.67 (0.64–0.73)    | -0.01 (-0.04–0.04) | 0.53   | 0.65 (0.60–0.70)    | 0.68 (0.65–0.75)    | 0.04 (-0.01–0.05)   | 0.13   | 0.02             | 0.71     | 0.11   |
| LVM index (g/m <sup>2</sup> ) | 109 (87–137)        | 92 (75–115)         | -18 (-35–-2)       | 0.001  | 136 (106–175)       | 107 (76–141)        | -42 (-51–-17)       | 0.002  | 0.009            | 0.14     | 0.048  |
| Coronary calcium score (AU)   | 0 (0–75)            | 0 (0–107)           | 0 (0–1)            | 0.56   | 0 (0–77)            | 3 (0–172)           | 0 (0–23)            | 0.005  | 0.53             | 0.18     | 0.07   |

Mean ± standard deviation, median (interquartiles)

LVM—left ventricular mass.

<https://doi.org/10.1371/journal.pone.0191009.t003>

EF is increased and associated with BMI in patients with CKD [30,31]. Recently, Okyay et al. have shown an important relationship between EF and BMI, waist circumference and percentage of body fat mass analyzed by bioimpedance in patients who underwent hemodialysis [32]. In the present study, we prospectively demonstrated a relationship between an increase of EF in parallel with an increase of BMI in incident KTX recipients. Of note, Cordeiro et al. [33] have described a relationship between increases of EF and incidence of cardiovascular events in CKD patients. Additionally, in that study, EF was a better predictor of cardiovascular risk than abdominal visceral fat.

Few studies have evaluated the relationship between EF and LVM in patients undergoing KTX [19]. It is well known that ventricular hypertrophy, which is a common finding in KTX recipients [34] is associated with cardiovascular outcomes [35]. Çolak et al., in a cross-sectional study, have demonstrated a lower EF volume in KTX patients compared to those in hemodialysis. Interestingly, the authors observed a direct relationship between EF volume and LVM in both groups [19]. The pathways which links EF with ventricular remodeling remains unclear. However, a direct influence of fat gain by obstructive factor or paracrine mechanism, via

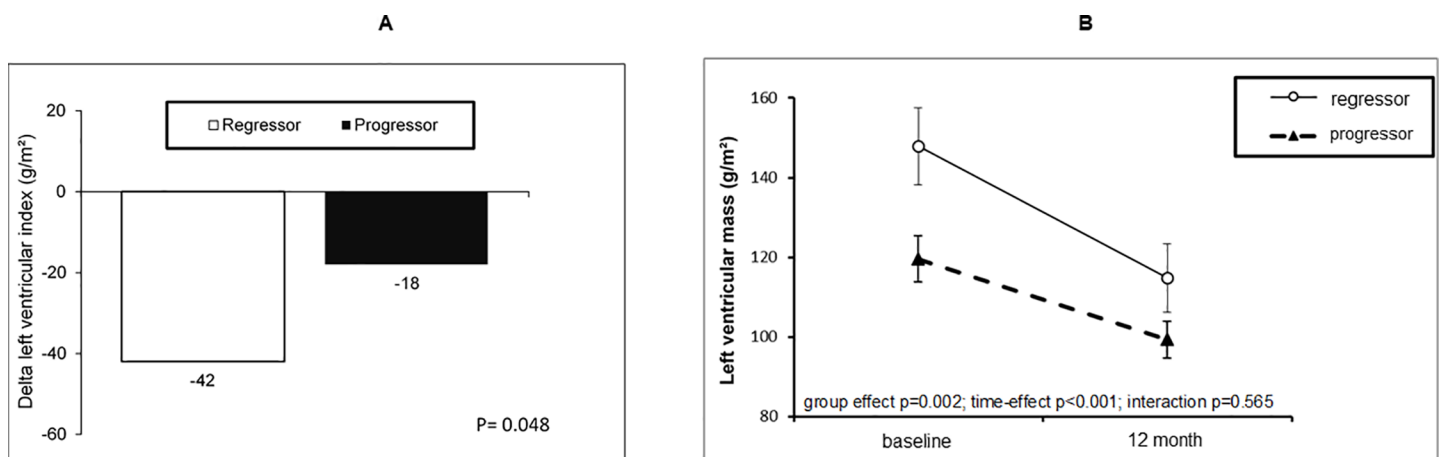

Fig 2. Comparison of the left ventricular mass index during the study between the epicardial fat regressor and progressor groups (2A –delta of LVMi and 2B –GEE model).

<https://doi.org/10.1371/journal.pone.0191009.g002>



inflammatory mediators, adipokines and activation of the renin angiotensin aldosterone system, could be a possible explanation [36,37]. Although, our results suggest an association between EF gain and lower reduction of VM, the adjusted statistical analysis did not confirm this finding.

We have previously demonstrated an independent relationship between pericardial fat and coronary calcification in pre-dialysis CKD patients [38]. Kerr et al. have demonstrated an association between EF, interleukin 6, and vascular calcification in a similar population [31]. However, no data describe the role of pericardial or EF in vascular calcification in KTX recipients. In the present study, no relationship was observed between the presence or progression of coronary calcification and EF. This result could be attributed to the young age of the study population, short duration of previous dialysis therapy, a low prevalence of diabetic patients, low incidence of coronary calcification, and a well-functioning kidney graft.

To our knowledge, this is the first study to evaluate the behavior of EF in incident KTX. Although some results pointed out a possible relationship between EF and LVM, this finding could not be confirmed. A possible explanation relies on the limitations of this study such as, a relatively small and young group of patients, and a short period of follow-up.

## Conclusion

The impact of EF gain on ventricular mass after KTX could not be definitely confirmed. Further prospective studies in a large sample of KTX patients should be considered to address a possible causal relationship between EF gain and cardiac hypertrophy in this population.

## Supporting information

**S1 File. Available study data PLOS ONE.xlsx.**  
(XLSX)

## Author Contributions

**Conceptualization:** Daniel Constantino Yazbek, Carlos Eduardo Rochitte, Raul Dias dos Santos Filho, Maria Eugênia F. Canziani.

**Data curation:** Daniel Constantino Yazbek, Maria Eugênia F. Canziani.

**Formal analysis:** Daniel Constantino Yazbek, Aluizio Barbosa Carvalho, Maria Eugênia F. Canziani.

**Funding acquisition:** Maria Eugênia F. Canziani.

**Investigation:** Daniel Constantino Yazbek, Cinara Sa Barros, Maria Eugênia F. Canziani.

**Methodology:** Daniel Constantino Yazbek, Cinara Sa Barros, Maria Eugênia F. Canziani.

**Project administration:** Maria Eugênia F. Canziani.

**Resources:** Maria Eugênia F. Canziani.

**Software:** Carlos Eduardo Rochitte.

**Supervision:** Aluizio Barbosa Carvalho, Jose Osmar Medina Pestana, Carlos Eduardo Rochitte, Raul Dias dos Santos Filho, Maria Eugênia F. Canziani.

**Writing – original draft:** Daniel Constantino Yazbek, Maria Eugênia F. Canziani.

**Writing – review & editing:** Daniel Constantino Yazbek, Carlos Eduardo Rochitte, Raul Dias dos Santos Filho, Maria Eugênia F. Canziani.

## References

1. Wang Y, Beydoun MA, Liang L, Caballero B, Kumanyika SK. Will all Americans become overweight or obese? Estimating the progression and cost of the US obesity epidemic. *Obesity (Silver Spring)* 2008; 16:2323–30.
2. [http://bvsmms.saude.gov.br/bvsm/publicacoes/vigitel\\_brasil\\_2015\\_saude\\_suplementar.pdf](http://bvsmms.saude.gov.br/bvsm/publicacoes/vigitel_brasil_2015_saude_suplementar.pdf)
3. Avesani CM, Draibe SA, Kamimura MA, Cendoroglo M, Pedrosa A, Castro ML et al. Assessment of body composition by dual energy X-ray absorptiometry, skinfold thickness and creatinine kinetics in chronic kidney disease patients. *Nephrol Dial Transplant*. 2004; 19(9):2289–95. <https://doi.org/10.1093/ndt/gfh381> PMID: 15252158
4. Lentine KL, Delos Santos R, Axelrod D, Schnitzler MA, Brennan DC, Tuttle-Newhall JE. Obesity and kidney transplant candidates: how big is too big for transplantation? *Am J Nephrol*. 2012; 36(6):575–86. <https://doi.org/10.1159/000345476> PMID: 23221167
5. Johnson DW, Isbel NM, Brown AM, Kay TD, Franzen K, Hawley CM et al. The effect of obesity on renal transplant outcomes. *Transplantation* 2002; 74:675–81. <https://doi.org/10.1097/01.TP.0000019424.37813.26> PMID: 12352885
6. Vincenti F, Schena FP, Paraskevas S, Hauser IA, Walker RG, Grinyo J; FREEDOM Study Group. A randomized, multicenter study of steroid avoidance, early steroid withdrawal or standard steroid therapy in kidney transplant recipients. *Am J Transplant*. 2008; 8(2):307–16. <https://doi.org/10.1111/j.1600-6143.2007.02057.x> PMID: 18211506
7. de Oliveira CM, Moura AE, Gonçalves L, Pinheiro LS, Pinheiro FM Jr, Esmeraldo RM. Post-transplantation weight gain: prevalence and the impact of steroid-free therapy. *Transplant Proc*. 2014; 46(6):1735–40. <https://doi.org/10.1016/j.transproceed.2014.05.027> PMID: 25131024
8. Ducloux D, Kazory A, Simula-Faivre D, Chalopin JM. One-year post-transplant weight gain is a risk factor for graft loss. *Am J Transplant* 2005; 5:2922–8. <https://doi.org/10.1111/j.1600-6143.2005.01104.x> PMID: 16303006
9. Hoogeveen EK, Aalten J, Rothman KJ, Roodnat JI, Mallat MJ, Borm G et al. Effect of obesity on the outcome of kidney transplantation: a 20-year follow-up. *Transplantation* 2011; 91:869–74. <https://doi.org/10.1097/TP.0b013e3182100f3a> PMID: 21326138
10. El-Agroudy AE, Wafa EW, Gheith OE, Shehab el-Dein AB, Ghoneim MA. Weight gain after renal transplantation is a risk factor for patient and graft outcome. *Transplantation* 2004; 77:1381–5. PMID: 15167594
11. Bayer ND, Cochetti PT, Anil Kumar MS, Teal V, Huan Y, Doria C et al. Association of metabolic syndrome with development of new-onset diabetes after transplantation. *Transplantation* 2010; 90: 861–866 <https://doi.org/10.1097/TP.0b013e3181f1543c> PMID: 20724958
12. Israni AK, Snyder JJ, Skeans MA, Kasiske BL. Clinical diagnosis of metabolic syndrome: predicting new-onset diabetes, coronary heart disease, and allograft failure late after kidney transplant. *Transpl Int* 2012; 25: 748–757. <https://doi.org/10.1111/j.1432-2277.2012.01488.x> PMID: 22548293
13. Wronska A, Kmiec Z. Structural and biochemical characteristics of various white adipose tissue depots. *Acta Physiol (Oxf)* 2012; 205:194–208.
14. Sacks HS, Fain JN. Human epicardial fat: what is new and what is missing? *Clin Exp Pharmacol Physiol* 2011; 28:879–887.
15. Ouchi N, Parker JL, Lugus JJ, Walsh K. Adipokines in inflammation and metabolic disease. *Nat Rev Immunol*. 2011; 11(2):85–97. <https://doi.org/10.1038/nri2921> PMID: 21252989
16. Ito T, Nasu K, Terashima M, Ehara M, Kinoshita Y, Ito T et al. The impact of epicardial fat volume on coronary plaque vulnerability: insight from optical coherence tomography analysis. *Eur Heart J Cardiovasc Imaging*. 2012; 13(5):408–15. <https://doi.org/10.1093/ehjci/jes022> PMID: 22294682
17. You S, Sun JS, Park SY, Baek Y, Kang DK. Relationship between indexed epicardial fat volume and coronary plaque volume assessed by cardiac multidetector CT. *Medicine (Baltimore)*. 2016; 95(27): e4164.
18. Watanabe K, Kishino T, Sano J, Ariga T, Okuyama S, Mori H et al. Relationship between epicardial adipose tissue thickness and early impairment of left ventricular systolic function in patients with preserved ejection fraction. *Heart Vessels*. 2016; 31(6):1010–5. <https://doi.org/10.1007/s00380-015-0650-8> PMID: 25721924
19. Çolak H, Kilicarlan B, Tekce H, Tanrisev M, Tugmen C, Aktas G et al. Relationship between epicardial adipose tissue, inflammation and volume markers in hemodialysis and transplant patients. *Ther Apher Dial*. 2015; 19(1):56–62. <https://doi.org/10.1111/1744-9987.12276> PMID: 25628169
20. Yazbek DC, de Carvalho AB, Barros CS, Medina Pestana JO, Canziani ME. Effect of Statins on the Progression of Coronary Calcification in Kidney Transplant Recipients. *PLoS One*. 2016 Apr 21; 11(4): e0151797. <https://doi.org/10.1371/journal.pone.0151797> PMID: 27100788

21. Levey AS, Stevens LA, Schmid CH, Zhang YL, Castro AF 3rd, Feldman HI et al. CKD-EPI (Chronic Kidney Disease Epidemiology Collaboration). A new equation to estimate glomerular filtration rate. *Ann Intern Med.* 2009 150 (9):604–612. PMID: [19414839](#)
22. Agatston AS, Janowitz WR, Hildner FJ, Zusmer NR, Viamonte M Jr, Detrano R. Quantification of coronary artery calcium using ultrafast computed tomography. *J Am Coll Cardiol.* 1990 15 (4):827–832. PMID: [2407762](#)
23. Lang RM, Bierig M, Devereux RB, Flachskampf FA, Foster E, Pellikka PA et al. Recommendations for chamber quantification: a report from the American Society of Echocardiography's Guidelines and Standards Committee and the Chamber Quantification Writing Group, developed in conjunction with the European Association of Echocardiography, a branch of the European Society of Cardiology. *J Am Soc Echocardiogr* 2005 18 (12): 1440–1463. <https://doi.org/10.1016/j.echo.2005.10.005> PMID: [16376782](#)
24. Kwan JM, Hajjiri Z, Metwally A, Finn PW, Perkins DL. Effect of the Obesity Epidemic on Kidney Transplantation: Obesity Is Independent of Diabetes as a Risk Factor for Adverse Renal Transplant Outcomes. *PLoS One.* 2016 Nov 16; 11(11):e0165712. <https://doi.org/10.1371/journal.pone.0165712> PMID: [27851743](#)
25. Uysal E, Yuzbasioglu MF, Bakir H, Gurer OA, Ikidag AM, Dokur M. Increase in Body Mass Index After Renal Transplantation. *Transplant Proc.* 2015; 47(5):1402–4. <https://doi.org/10.1016/j.transproceed.2015.04.028> PMID: [26093728](#)
26. Hart A, Smith JM, Skeans MA, Gustafson SK, Stewart DE, Cherikh WS et al. OPTN/SRTR 2015 Annual Data Report: Kidney. *Am J Transplant.* 2017; 17 Suppl 1:21–116.
27. Prasad GV, Kim SJ, Huang M, Nash MM, Zaltzman JS, Fenton SS, et al. Reduced incidence of new-onset diabetes mellitus after renal transplantation with 3-hydroxy-3-methylglutaryl-coenzyme a reductase inhibitors (statins). *Am J Transplant.* 2004; 4:1897–903. <https://doi.org/10.1046/j.1600-6143.2004.00598.x> PMID: [15476492](#)
28. von Düring ME, Jenssen T, Bollerslev J, Åsberg A, Godang K, Hartmann A. Visceral fat is strongly associated with post-transplant diabetes mellitus and glucose metabolism 1 year after kidney transplantation. *Clin Transplant.* 2017 Jan; 31(1). <https://doi.org/10.1111/ctr.12869> PMID: [27859633](#)
29. von Düring ME, Jenssen T, Bollerslev J, Åsberg A, Godang K, Eide IA et al. Visceral fat is better related to impaired glucose metabolism than body mass index after kidney transplantation. *Transpl Int.* 2015; 28(10):1162–71. <https://doi.org/10.1111/tri.12606> PMID: [25970153](#)
30. Tonbul HZ, Turkmen K, Kayıkcıoğlu H, Ozbek O, Kayrak M, Biyik Z. Epicardial adipose tissue and coronary artery calcification in diabetic and nondiabetic end-stage renal disease patients. *Ren Fail* 2011; 33:770–775. <https://doi.org/10.3109/0886022X.2011.599913> PMID: [21770856](#)
31. Kerr JD, Holden RM, Morton AR, Nolan RL, Hopman WM, Pruss CM et al. Associations of epicardial fat with coronary calcification, insulin resistance, inflammation, and fibroblast growth factor-23 in stage 3–5 chronic kidney disease. *BMC Nephrol.* 2013 26;14:26. <https://doi.org/10.1186/1471-2369-14-26>
32. Ulusal Okyay G, Okyay K, Polattaş Solak E, Sahinarslan A, Paşaoğlu Ö, Ayerden Ebinç F et al. Echocardiographic epicardial adipose tissue measurements provide information about cardiovascular risk in hemodialysis patients. *Hemodial Int.* 2015; 19(3):452–62. <https://doi.org/10.1111/hdi.12276> PMID: [25643907](#)
33. Cordeiro AC, Amparo FC, Oliveira MA, Amodeo C, Smanio P, Pinto IM et al. Epicardial fat accumulation, cardiometabolic profile and cardiovascular events in patients with stages 3–5 chronic kidney disease. *Journal of Internal Medicine* 2015; 278:77–87. <https://doi.org/10.1111/joim.12344> PMID: [25556720](#)
34. Letachowicz K, Boratyńska M, Obremaska M, Kamińska D, Goździk A, Mazanowska O et al. Prevalence of Left Ventricular Hypertrophy and Left Ventricular Dysfunction in Older Renal Transplant Recipients. *Transplant Proc.* 2016; 48(5):1641–3. <https://doi.org/10.1016/j.transproceed.2016.02.053> PMID: [27496463](#)
35. Arnol M, Knap B, Oblak M, Buturović-Ponikvar J, Bren AF, Kandus A. Subclinical left ventricular echocardiographic abnormalities 1 year after kidney transplantation are associated with graft function and future cardiovascular events. *Transplant Proc.* 2010; 42(10):4064–8. <https://doi.org/10.1016/j.transproceed.2010.09.044> PMID: [21168628](#)
36. Wronska A, Kmiec Z. Structural and biochemical characteristics of various white adipose tissue depots. *Acta Physiol (Oxf).* 2012; 205(2):194–208.
37. Salazar J, Luzardo E, Mejías JC, Rojas J, Ferreira A, Rivas-Ríos JR et al. Epicardial Fat: Physiological, Pathological, and Therapeutic Implications. *Cardiol Res Pract.* 2016; 2016:1291537. <https://doi.org/10.1155/2016/1291537> PMID: [27213076](#)
38. Harada PH, Canziani ME, Lima LM, Kamimura M, Rochitte CE, Lemos MM et al. Pericardial fat is associated with coronary artery calcification in non-dialysis dependent chronic kidney disease patients. *PLoS One.* 2014 Dec 5; 9(12):e114358. <https://doi.org/10.1371/journal.pone.0114358> PMID: [25479288](#)
